# Supplementary material for: Detecting seasonal ice dynamics in satellite images
Source: Copernicus journal article supplement (doi:10.5194/tc-14-4365-2020), 2020-12-02
Supplement: Supplementary file [file tc-14-4365-2020-supplement-title-page.pdf › tc-14-4365-2020-supplement-title-page.pdf]

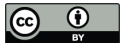

## *Supplement of*

# Detecting seasonal ice dynamics in satellite images

**Chad A. Greene et al.**

*Correspondence to:* Chad A. Greene ([chad@chadagreene.com](mailto:chad@chadagreene.com))

- tc-14-4365-2020-supplement-title-page.pdf
- greene\_seasonal\_methods\_paper\_matlab
  - .DS\_Store
  - README.txt
  - byrd\_test\_data.mat
  - compute\_seasonal\_uncertainty.m
  - image\_pair\_times.mat
  - itslive\_seasonal\_A.mat
  - itslive\_seasonal\_Npairs.mat
  - itslive\_seasonal\_interannual.mat
  - itslive\_seasonal\_iter.mat
  - itslive\_seasonal\_parameter\_tests.m
  - itslive\_seasonal\_phase.mat
  - itslive\_seasonal\_unc.m
  - itslive\_seasonal\_unc.mat
  - make\_fig01.m
  - make\_fig02.m
  - make\_fig03.m
  - make\_fig04.m
  - make\_fig05.m
  - make\_fig06.m
  - make\_fig07.m
  - make\_figA01.m
  - point\_ts\_KAN\_L.mat
  - recovered\_amp\_phase\_all\_4.mat

The copyright of individual parts of the supplement might differ from the CC BY 4.0 License.
